# Supplementary material for: Expression characterization of the guanylate-binding protein gene family in breast cancer and its association with the immune microenvironment
Source: PeerJ. 2025 Sep 18;13:e20058. doi: 10.7717/peerj.20058 (PMC12450374; doi:10.7717/peerj.20058)
Supplement: Supplemental Information 1 [file peerj-13-20058-s001.xls]

## Sheet: Sheet1
ITEM TO CHECK	IMPORTANCE	CHECKLIST
EXPERIMENTAL DESIGN
Definition of experimental and control groups	E	Page9 Line198-200
Number within each group	E	Page10 Line206-247
Assay carried out by core lab or investigator's lab?	D	Not Applicable
Acknowledgement of authors' contributions	D	Page23 Line503-507
SAMPLE
Description	E	Page9 Line198-247
Volume/mass of sample processed	D	Page9 Line198-247
Microdissection or macrodissection	E	Page10 Line213-220
Processing procedure	E	Page9 Line198-247
If frozen - how and how quickly?	E	Page10 Line213-220
If fixed - with what, how quickly?	E	Page9 Line198-247
Sample storage conditions and duration (especially for FFPE samples)	E	Page10 Line213-220
NUCLEIC ACID EXTRACTION
Procedure and/or instrumentation	E	Page9 Line198-247
Name of kit and details of any modifications	E	Page10 Line213-220
Source of additional reagents used	D	Not Applicable
Details of DNase or RNAse treatment	E	Page10 Line213-220
Contamination assessment (DNA or RNA)	E	Page10 Line213-220
Nucleic acid quantification	E	Page10 Line213-220
Instrument and method	E	Page10 Line213-220
Purity (A260/A280)	D	Not Applicable
Yield	D	Not Applicable
RNA integrity method/instrument	E	Page10 Line213-220
RIN/RQI or Cq of 3' and 5' transcripts	E	Page10 Line213-220
Electrophoresis traces	D	Not Applicable
Inhibition testing (Cq dilutions, spike or other)	E	Page10 Line213-220
REVERSE TRANSCRIPTION
Complete reaction conditions	E	Page10 Line213-220
Amount of RNA and reaction volume	E	Page10 Line213-220
Priming oligonucleotide (if using GSP) and concentration	E	Page10 Line213-220
Reverse transcriptase and concentration	E	Page10 Line213-220
Temperature and time	E	Page10 Line213-220
Manufacturer of reagents and catalogue numbers	D	Page10 Line213-220
Cqs with and without RT	D*	Not Applicable
Storage conditions of cDNA	D	Page10 Line213-220
qPCR TARGET INFORMATION
If multiplex, efficiency and LOD of each assay.	E	Page10 Line213-220
Sequence accession number	E	Page10 Line213-220
Location of amplicon	D	Not Applicable
Amplicon length	E	Page10 Line213-220
In silico specificity screen (BLAST, etc)	E	Page10 Line213-220
Pseudogenes, retropseudogenes or other homologs?	D	Not Applicable
Sequence alignment	D	Not Applicable
Secondary structure analysis of amplicon	D	Not Applicable
Location of each primer by exon or intron (if applicable)	E	Page10 Line213-220
What splice variants are targeted?	E	Page10 Line213-220
qPCR OLIGONUCLEOTIDES
Primer sequences	E	Page10 Line213-220
RTPrimerDB Identification Number	D	Page10 Line213-220
Probe sequences	D**	Not Applicable
Location and identity of any modifications	E	Page10 Line213-220
Manufacturer of oligonucleotides	D	Page10 Line213-220
Purification method	D	Page10 Line213-220
qPCR PROTOCOL
Complete reaction conditions	E	Page10 Line213-220
Reaction volume and amount of cDNA/DNA	E	Page10 Line213-220
Primer, (probe), Mg++ and dNTP concentrations	E	Page10 Line213-220
Polymerase identity and concentration	E	Page10 Line213-220
Buffer/kit identity and manufacturer	E	Page10 Line213-220
Exact chemical constitution of the buffer	D	Not Applicable
Additives (SYBR Green I, DMSO, etc.)	E	Page10 Line213-220
Manufacturer of plates/tubes and catalog number	D	Not Applicable
Complete thermocycling parameters	E	Page10 Line213-220
Reaction setup (manual/robotic)	D	Not Applicable
Manufacturer of qPCR instrument	E	Page10 Line213-220
qPCR VALIDATION
Evidence of optimisation (from gradients)	D	Not Applicable
Specificity (gel, sequence, melt, or digest)	E	Page10 Line213-220
For SYBR Green I, Cq of the NTC	E	Page10 Line213-220
Standard curves with slope and y-intercept	E	Page10 Line213-220
PCR efficiency calculated from slope	E	Page10 Line213-220
Confidence interval for PCR efficiency or standard error	D	Not Applicable
r2 of standard curve	E	Page10 Line213-220
Linear dynamic range	E	Page10 Line213-220
Cq variation at lower limit	E	Page10 Line213-220
Confidence intervals throughout range	D	Not Applicable
Evidence for limit of detection	E	Page10 Line213-220
If multiplex, efficiency and LOD of each assay.	E	Page10 Line213-220
DATA ANALYSIS
qPCR analysis program (source, version)	E	Page10 Line213-220
Cq method determination	E	Page10 Line213-220
Outlier identification and disposition	E	Page10 Line213-220
Results of NTCs	E	Page10 Line213-220
Justification of number and choice of reference genes	E	Page10 Line213-220
Description of normalisation method	E	Page10 Line213-220
Number and concordance of biological replicates	D	Page10 Line213-220
Number and stage (RT or qPCR) of technical replicates	E	Page10 Line213-220
Repeatability (intra-assay variation)	E	Page10 Line213-220
Reproducibility (inter-assay variation, %CV)	D	Page10 Line213-220
Power analysis	D	Page10 Line213-220
Statistical methods for result significance	E	Page10 Line213-220
Software (source, version)	E	Page10 Line213-220
Cq or raw data submission using RDML	D	Not Applicable
Table 1. MIQE checklist for authors, reviewers and editors. All essential information (E) must be submitted with the manuscript. Desirable
information (D) should be submitted if available. If using primers obtained from RTPrimerDB, information on qPCR target, oligonucleotides,
protocols and validation is available from that source.
*: Assessing the absence of DNA using a no RT assay is essential when first extracting RNA. Once the sample has been validated as
RDNA-free, inclusion of a no-RT control is desirable, but no longer essential.
**: Disclosure of the probe sequence is highly desirable and strongly encouraged. However, since not all commercial pre-designed assay
vendors provide this information, it cannot be an essential requirement. Use of such assays is advised against.
